# Supplementary material
Source: PubMed Central journal article supplement (PMC3116015)
Supplement: NIHMS275827-supplement-1.pdf [file NIHMS275827-supplement-1.pdf]

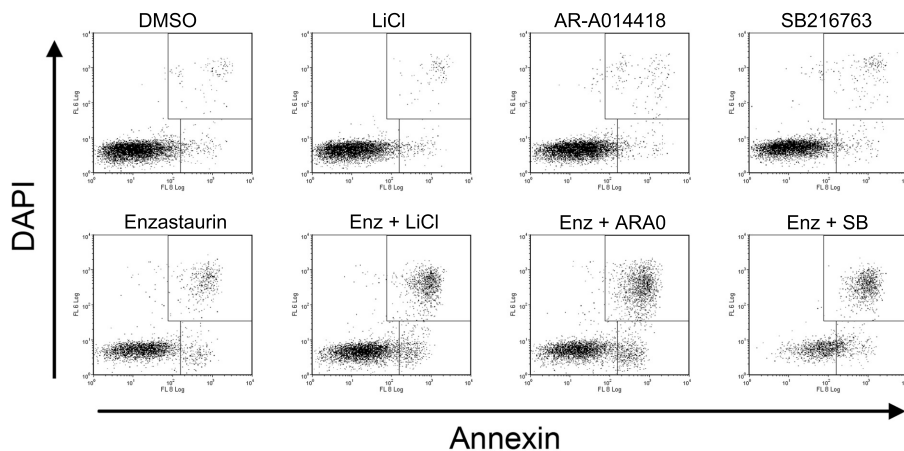

**Figure S1.** HuT-78 cells were cultured in 4  $\mu$ M Enzastaurin, 5 mM LiCl, 5  $\mu$ M AR-A014418, 5  $\mu$ M SB216763 or DMSO (vehicle control) and harvested after 5 days. Detection of Annexin V and DAPI staining was performed as described previously. Data shown is representative of three independent experiments.

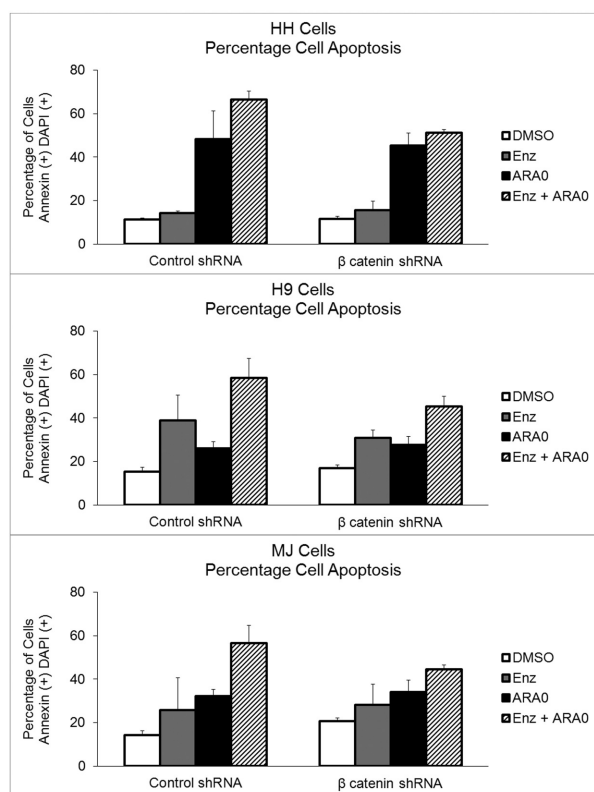

**Figure S2.** Detection of Annexin V and DAPI staining was performed on HH, H9 and MJ cells transduced with lentivirus as described previously. Data from three separate experiments was used to quantify double positive cells as a percentage of total cells. Error bars represent standard deviation.

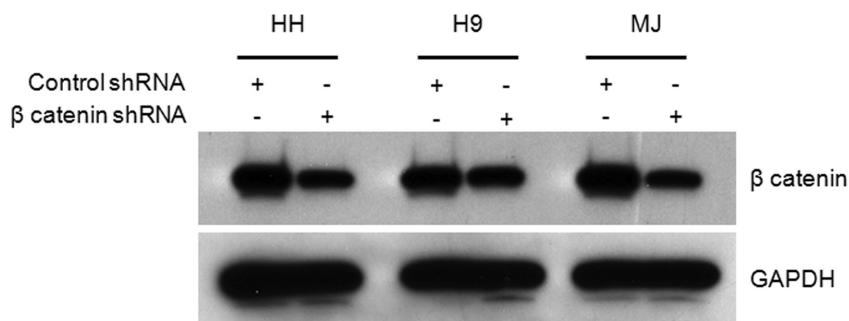

**Figure S3.**  $\beta$  catenin expression was knocked down in HH, H9 and MJ cells using an shRNA-expressing lentivirus. Cells were then treated with inhibitors and  $\beta$  catenin protein was examined by immunoblot after 24 hours.
